# Supplementary material for: Self-assembly of one-pot synthesized CexZr1−xO2–BaO·nAl2O3 nanocomposites promoted by site-selective doping of alumina with barium
Source: Royal Society of Chemistry journal article supplement (doi:10.1039/c3ta01214j), 2013-01-01
Supplement: c3ta01214j.pdf [file c3ta01214j.pdf]

## Self-assembly of one-pot synthesized $\text{Ce}_x\text{Zr}_{1-x}\text{O}_2\text{-BaO}\cdot n\text{Al}_2\text{O}_3$ nanocomposites promoted by site-selective doping of alumina with barium

Juan Carlos Hernández-Garrido<sup>a</sup>, Stefano Desinan<sup>b</sup>, Roberta Di Monte<sup>c</sup>, Emiliano Fonda<sup>d</sup>, Paul A. Midgley<sup>e</sup>, José Juan Calvino<sup>a</sup> and Jan Kašpar<sup>c</sup>

### SUPPLEMENTARY INFORMATION

Table S1. Textural properties and phase composition of the nanocomposites after calcination at various temperatures.

| Sample                                      | Calcination Temperature | BET Surface Area | Al <sub>2</sub> O <sub>3</sub> Phases |    |    | BHA | Particle size Ce <sub>0.2</sub> Zr <sub>0.8</sub> O <sub>2</sub> |
|---------------------------------------------|-------------------------|------------------|---------------------------------------|----|----|-----|------------------------------------------------------------------|
|                                             |                         |                  | γ                                     | θ  | α  |     |                                                                  |
|                                             |                         |                  | weight %                              |    |    |     |                                                                  |
| CZ20(30)-BDA                                | 973                     | 264              | 100                                   |    |    |     |                                                                  |
|                                             | 1373                    | 99               | 67                                    | 33 |    | 11  |                                                                  |
|                                             | 1473                    | 19               | 48                                    | 5  | 47 | 23  |                                                                  |
| CZ20(13)-BDA                                | 973                     | 280              | 100                                   |    |    |     |                                                                  |
|                                             | 1373                    | 118              | 85                                    | 15 |    | 10  |                                                                  |
|                                             | 1473                    | 72               | 38                                    | 37 | 8  | 17  | 15                                                               |
| CZ20(35)-Al <sub>2</sub> O <sub>3</sub> [a] | 773                     | 198              | 100                                   |    |    |     |                                                                  |
|                                             | 1373                    | 43               | 100                                   |    |    |     | 16                                                               |
| CZ20(13)-Al <sub>2</sub> O <sub>3</sub> [a] | 773                     | 213              | 100                                   |    |    |     |                                                                  |
|                                             | 1373                    | 68               | 100                                   |    |    |     | 14                                                               |

[a] Conventional CeO<sub>2</sub>-ZrO<sub>2</sub>-Al<sub>2</sub>O<sub>3</sub> nanocomposite from a previous study.[1]

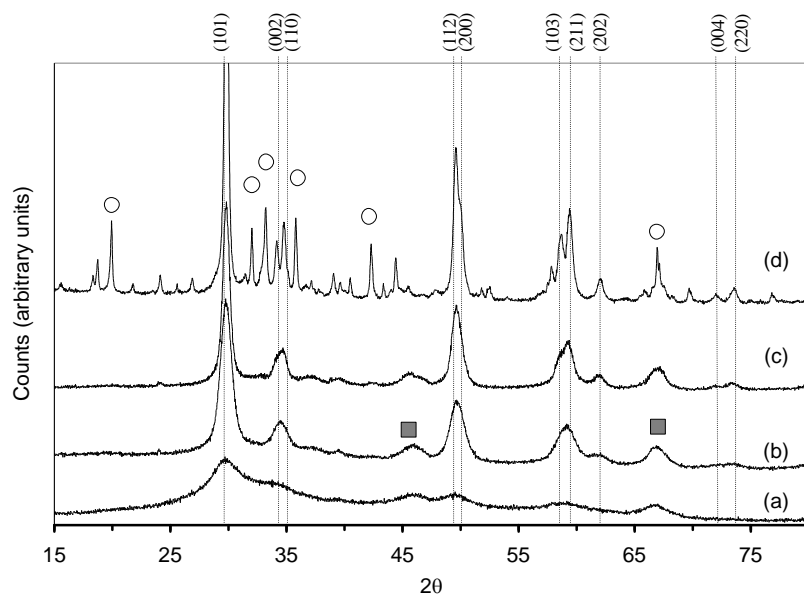

**Figure S1.** XRD patterns of CZ20(30)-BDA, calcined at (a) 973, (b) 1273, (c) 1373 and (d) 1473 K. ○, BHA; ■,  $\gamma\text{-Al}_2\text{O}_3$ . Dashed lines represent the reflections due to tetragonal  $\text{Ce}_{0.2}\text{Zr}_{0.8}\text{O}_2$ .

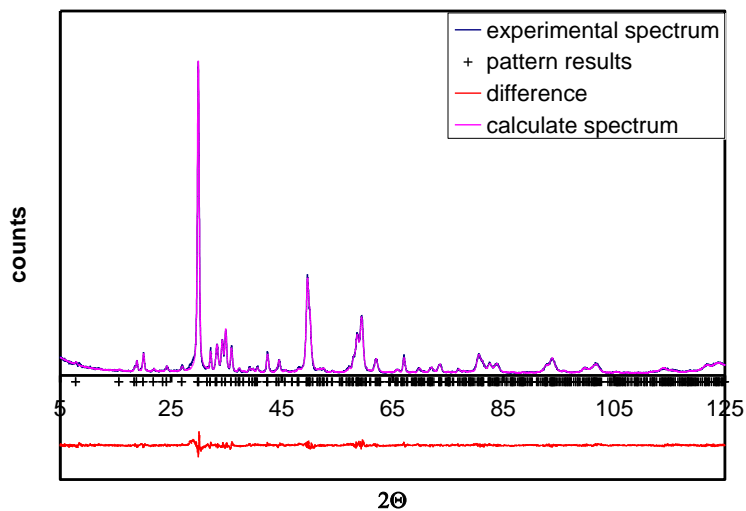

**Figure S2.** Rietveld structural refinement of the  $\text{Ce}_{0.2}\text{Zr}_{0.8}\text{O}_2(50\text{wt}\%)\text{-BaO} \cdot 5.25\text{Al}_2\text{O}_3$  calcined at 1473 K. The powder patterns were collected in step scanning mode. The step size used was  $0.02^\circ 2\theta$  and the counting time was 10 sec/step. The patterns were measured in the range  $5\text{-}125^\circ 2\theta$ . The refinement was performed with Rietveld method. The general structure analysis system (RIETAN) was used.

**Table S2. Results of Rietveld Structural Refinement of XRD patterns of Ce<sub>0.2</sub>Zr<sub>0.8</sub>O<sub>2</sub>(50wt%)-BaO·5.25 Al<sub>2</sub>O<sub>3</sub> calcined at 1473 K.**

| sample                                                            | Ce <sub>0.2</sub> Zr <sub>0.8</sub> O <sub>2</sub> (50wt%)-BaO·5.25 Al <sub>2</sub> O <sub>3</sub>                          |
|-------------------------------------------------------------------|-----------------------------------------------------------------------------------------------------------------------------|
| Rwp                                                               | 10                                                                                                                          |
| Phase composition                                                 | Ce <sub>0.2</sub> Zr <sub>0.8</sub> O <sub>2</sub> (TZ) + Ba-β <sub>1</sub> β <sub>11</sub> -Al <sub>2</sub> O <sub>3</sub> |
| Nominal TZ(%wt)                                                   | 50                                                                                                                          |
| Calculated TZ (%wt)                                               | 49                                                                                                                          |
| Ce <sub>0.2</sub> Zr <sub>0.8</sub> O <sub>2</sub>                |                                                                                                                             |
| Space Group                                                       | <i>P</i> <sub>4</sub> <sub>2</sub> / <i>n</i> <i>mc</i>                                                                     |
| Cell Parameter                                                    | <i>a</i> = <i>b</i> = 3.6492(1) Å [a]<br><i>c</i> = 5.2534(2) Å                                                             |
| Ba-β <sub>1</sub> β <sub>11</sub> -Al <sub>2</sub> O <sub>3</sub> |                                                                                                                             |
| Space Group                                                       | <i>P</i> <sub>6</sub> <sub>3</sub> / <i>m</i> <i>mc</i>                                                                     |
| Cell Parameters                                                   | <i>a</i> = <i>b</i> = 5.5889(6) Å<br><i>c</i> = 22.744(2) Å                                                                 |
| Nominal composition                                               | Ba <sub>0.96</sub> Al <sub>10.83</sub> O <sub>17.21</sub>                                                                   |
| Calculated composition                                            | Ba <sub>0.79</sub> Al <sub>10.97</sub> O <sub>17.23</sub>                                                                   |
| Crystallite shape factor                                          | 1.0                                                                                                                         |
| Calculated ratio β <sub>1</sub> /β <sub>11</sub>                  | 9.8 [b]                                                                                                                     |

Formatted Table

[a] Based on the Vegard law, the composition of the solid solution corresponds to Ce<sub>0.2</sub>Zr<sub>0.8</sub>O<sub>2</sub>

[b] nominal value = 1.0

**Table S3. XANES characterisation of the Ce<sub>0.2</sub>Zr<sub>0.8</sub>O<sub>2</sub>CZ20(yy)-Al<sub>2</sub>O<sub>3</sub> and Ce<sub>0.2</sub>Zr<sub>0.8</sub>O<sub>2</sub>CZ20(yy)-BaO·5.25Al<sub>2</sub>O<sub>3</sub>BDA nanocomposites: effect of thermal and redox ageing on the fraction of reduced cerium. Results are obtained by linear combination of standard compounds spectra: Ce(III)(CeAlO<sub>3</sub>) and Ce(IV)(Ce<sub>0.2</sub>Zr<sub>0.8</sub>O<sub>2</sub>).**

| Sample                                       | Calcination Temperature [K] | Ce <sup>3+</sup> /(Ce <sup>3+</sup> +Ce <sup>4+</sup> ) |         |             |
|----------------------------------------------|-----------------------------|---------------------------------------------------------|---------|-------------|
|                                              |                             | mole fraction                                           |         |             |
|                                              |                             | Redox Ageing Treatment                                  |         |             |
|                                              |                             | Not Aged                                                | HTR-LTO | HTR-LTO-HTO |
| CZ20(30)-BDA                                 | 973                         | 0.00                                                    |         |             |
|                                              | 1373                        | 0.01                                                    |         |             |
| CZ20(13)-BDA                                 | 973                         | 0.00                                                    | 0.68    | 0.35        |
|                                              | 1373                        | 0.03                                                    | 0.29    | 0.14        |
| CZ20(13)/Al <sub>2</sub> O <sub>3</sub> - IW | 773                         | 0.00                                                    | 0.52    |             |
|                                              | 1373                        | 0.29                                                    | 0.48    |             |

Formatted Table

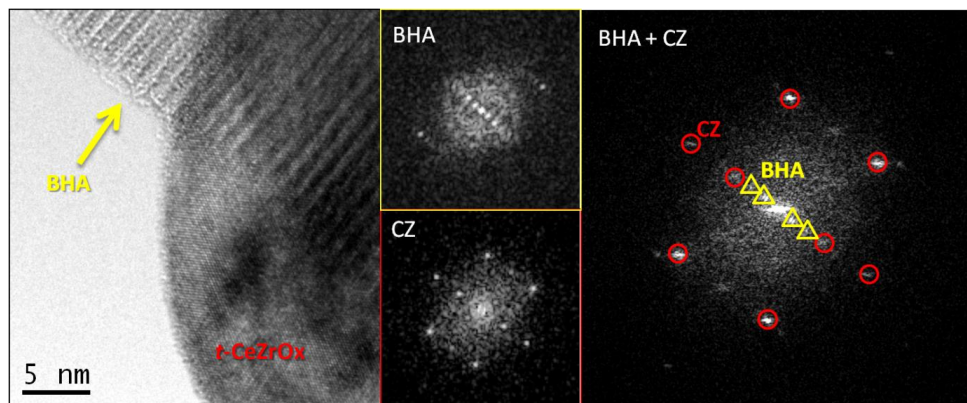

**Figure S3.** Interaction between the BHA phase and the mixed oxide phase: Consistently the (0001) reflections of the BHA are perfectly aligned with the (-11-2) reflections of the tetragonal Ce-Zr phase. (Left) HREM image for the sample after calcination at 1473 K. (Centre) Digital Diffraction Patterns from both the Barium Hexaaluminate (BHA) area and the tetragonal Ce-Zr nanocrystal. (Right) DDP obtained from the imaged area (BHA+CZ nanocrystal) in which the (0001) reflections -triangles- of the BHA are perfectly aligned with the (-11-2) reflections - circles - of the tetragonal Ce-Zr phase.

[1] R. Di Monte, P. Fornasiero, S. Desinan, J. Kaspar, J. M. Gatica, J. J. Calvino, E. Fonda, *Chem Mater* **2004**, *16*, 4273.
